# Supplementary material for: The Denominator problem: estimating the size of local populations of men-who-have-sex-with-men and rates of HIV and other STIs in Switzerland
Source: PubMed Central journal article supplement — Sex Transm Infect. 2019 Jan 24;95(4):285–91. doi: 10.1136/sextrans-2017-053363 (PMC6585275; doi:10.1136/sextrans-2017-053363), 2019-01-24
Supplement: sextrans-2017-053363supp002.pdf [file sextrans-2017-053363supp002.pdf]

**Table S1:** Swiss postal code areas (PCA), permanent male population (aged 15–64); and estimates for the absolute size of the MSM populations, using two different approaches

| PCA | Index city          | <i>p</i>       | <i>s</i>   | <i>K</i>    | <i>K'</i>   | <i>M</i> <sub>50%</sub> | <i>M</i> <sub>2.5%</sub> | <i>M</i> <sub>97.5%</sub> | <i>M'</i>    | <i>M''</i>   | %           |
|-----|---------------------|----------------|------------|-------------|-------------|-------------------------|--------------------------|---------------------------|--------------|--------------|-------------|
| 10  | <b>Lausanne</b>     | <b>106,902</b> | <b>338</b> | <b>1.86</b> | <b>1.83</b> | <b>5,761</b>            | <b>5,158</b>             | <b>6,429</b>              | <b>5,717</b> | <b>6,000</b> | <b>5.4%</b> |
| 11  | Morges              | 28,332         | 31         | 0.66        | 0.66        | 543                     | 385                      | 744                       | 545          | 500          | 1.9%        |
| 12  | <b>Genève</b>       | <b>174,400</b> | <b>347</b> | <b>1.18</b> | <b>1.19</b> | <b>5,985</b>            | <b>5,360</b>             | <b>6,667</b>              | <b>6,074</b> | <b>6,000</b> | <b>3.4%</b> |
| 13  | Orbe                | 15,436         | 13         | 0.54        | 0.53        | 241                     | 144                      | 376                       | 238          | 200          | 1.6%        |
| 14  | Yverdon-les-Bains   | 24,743         | 32         | 0.77        | 0.79        | 550                     | 388                      | 751                       | 571          | 600          | 2.2%        |
| 15  | Moudon              | 15,532         | 8          | 0.38        | 0.34        | 170                     | 89                       | 285                       | 157          | 200          | 1.1%        |
| 16  | Bulle               | 32,958         | 23         | 0.45        | 0.41        | 426                     | 285                      | 604                       | 398          | 400          | 1.3%        |
| 17  | Fribourg            | 46,183         | 68         | 0.87        | 0.85        | 1,167                   | 917                      | 1,460                     | 1,151        | 1,200        | 2.5%        |
| 18  | Montreux            | 55,026         | 50         | 0.55        | 0.54        | 883                     | 667                      | 1,139                     | 863          | 900          | 1.6%        |
| 19  | Sion                | 48,707         | 40         | 0.50        | 0.50        | 713                     | 523                      | 945                       | 712          | 700          | 1.5%        |
| 20  | Neuchâtel           | 32,814         | 52         | 0.93        | 0.93        | 882                     | 669                      | 1,137                     | 894          | 900          | 2.7%        |
| 21  | Val-de-Travers      | 3,853          | 4          | 0.66        | 0.64        | 74                      | 33                       | 138                       | 72           | 70           | 1.9%        |
| 22  | ValdeRus            | 1,071          | 2          | 0.80        | 1.12        | 25                      | 10                       | 50                        | 35           | 40           | 2.3%        |
| 23  | La Chaux-de-Fonds   | 16,405         | 20         | 0.73        | 0.78        | 345                     | 223                      | 504                       | 373          | 400          | 2.1%        |
| 24  | Le Locle            | 4,132          | 2          | 0.47        | 0.27        | 57                      | 22                       | 116                       | 33           | 30           | 1.4%        |
| 25  | Biel / Bienne       | 46,582         | 64         | 0.82        | 0.83        | 1,101                   | 854                      | 1,387                     | 1,133        | 1,100        | 2.4%        |
| 26  | Saint-Imier         | 4,945          | 4          | 0.57        | 0.44        | 82                      | 37                       | 153                       | 63           | 60           | 1.7%        |
| 27  | Moutier             | 9,440          | 5          | 0.42        | 0.29        | 114                     | 55                       | 206                       | 80           | 80           | 1.2%        |
| 28  | Delémont            | 12,631         | 10         | 0.52        | 0.42        | 190                     | 106                      | 308                       | 155          | 200          | 1.5%        |
| 29  | Porrentruy          | 7,368          | 6          | 0.55        | 0.51        | 118                     | 59                       | 206                       | 110          | 100          | 1.6%        |
| 30  | <b>Bern</b>         | <b>89,172</b>  | <b>289</b> | <b>1.90</b> | <b>1.95</b> | <b>4,907</b>            | <b>4,341</b>             | <b>5,499</b>              | <b>5,090</b> | <b>5,000</b> | <b>5.5%</b> |
| 31  | Köniz               | 32,225         | 31         | 0.59        | 0.60        | 551                     | 388                      | 756                       | 562          | 600          | 1.7%        |
| 32  | Lyss                | 28,872         | 25         | 0.54        | 0.50        | 451                     | 308                      | 637                       | 426          | 400          | 1.6%        |
| 33  | Herzogenbuchsee     | 16,138         | 18         | 0.67        | 0.63        | 315                     | 200                      | 468                       | 299          | 300          | 2.0%        |
| 34  | Burgdorf            | 22,792         | 25         | 0.66        | 0.64        | 439                     | 298                      | 616                       | 429          | 400          | 1.9%        |
| 35  | Langnau im Emmental | 12,461         | 12         | 0.60        | 0.63        | 218                     | 126                      | 346                       | 229          | 200          | 1.7%        |
| 36  | Thun                | 37,464         | 34         | 0.56        | 0.56        | 604                     | 430                      | 821                       | 614          | 600          | 1.6%        |
| 37  | Spiez               | 18,460         | 11         | 0.41        | 0.36        | 219                     | 127                      | 351                       | 194          | 200          | 1.2%        |
| 38  | Interlaken          | 14,752         | 15         | 0.63        | 0.62        | 268                     | 162                      | 407                       | 269          | 300          | 1.8%        |
| 39  | Sierre              | 42,783         | 28         | 0.41        | 0.38        | 515                     | 355                      | 713                       | 481          | 500          | 1.2%        |
| 40  | <b>Basel</b>        | <b>55,971</b>  | <b>231</b> | <b>2.37</b> | <b>2.46</b> | <b>3,851</b>            | <b>3,369</b>             | <b>4,368</b>              | <b>4,029</b> | <b>4,000</b> | <b>6.9%</b> |
| 41  | Riehen              | 64,085         | 78         | 0.73        | 0.77        | 1,357                   | 1,079                    | 1,670                     | 1,434        | 1,400        | 2.1%        |
| 42  | Laufen              | 11,722         | 9          | 0.51        | 0.45        | 174                     | 96                       | 287                       | 154          | 200          | 1.5%        |
| 43  | Rheinfelden         | 16,705         | 19         | 0.69        | 0.67        | 332                     | 215                      | 485                       | 326          | 300          | 2.0%        |
| 44  | Liestal             | 31,256         | 33         | 0.64        | 0.63        | 579                     | 410                      | 788                       | 579          | 600          | 1.9%        |
| 45  | Solothurn           | 32,746         | 42         | 0.76        | 0.79        | 725                     | 533                      | 956                       | 753          | 800          | 2.2%        |
| 46  | Olten               | 31,593         | 42         | 0.79        | 0.75        | 721                     | 535                      | 954                       | 697          | 700          | 2.3%        |
| 47  | Balsthal            | 9,103          | 8          | 0.57        | 0.57        | 151                     | 81                       | 255                       | 152          | 200          | 1.7%        |
| 48  | Zofingen            | 12,179         | 18         | 0.84        | 0.84        | 298                     | 191                      | 441                       | 298          | 300          | 2.4%        |
| 49  | Langenthal          | 16,892         | 15         | 0.56        | 0.57        | 275                     | 167                      | 417                       | 283          | 300          | 1.6%        |
| 50  | Aarau               | 40,106         | 50         | 0.74        | 0.78        | 865                     | 653                      | 1,114                     | 909          | 900          | 2.2%        |
| 51  | Wildeggen           | 5,971          | 6          | 0.63        | 0.67        | 110                     | 56                       | 192                       | 117          | 100          | 1.8%        |
| 52  | Brugg               | 14,251         | 16         | 0.68        | 0.69        | 280                     | 173                      | 424                       | 286          | 300          | 2.0%        |
| 53  | Würenlingen         | 12,552         | 13         | 0.64        | 0.58        | 232                     | 137                      | 359                       | 213          | 200          | 1.8%        |
| 54  | Baden               | 37,162         | 46         | 0.74        | 0.74        | 794                     | 595                      | 1,037                     | 803          | 800          | 2.1%        |
| 55  | Mellingen           | 8,144          | 12         | 0.83        | 0.93        | 195                     | 115                      | 307                       | 222          | 200          | 2.4%        |
| 56  | Lenzburg            | 33,047         | 37         | 0.67        | 0.69        | 645                     | 468                      | 863                       | 669          | 700          | 2.0%        |
| 57  | Reinach (AG)        | 21,893         | 14         | 0.43        | 0.40        | 271                     | 164                      | 412                       | 258          | 300          | 1.2%        |
| 60  | <b>Luzern</b>       | <b>88,019</b>  | <b>131</b> | <b>0.89</b> | <b>0.89</b> | <b>2,262</b>            | <b>1,893</b>             | <b>2,680</b>              | <b>2,294</b> | <b>2,300</b> | <b>2.6%</b> |

Table S1 (cont.)

| PCA                | Index city        | p                | s            | K           | K'          | M <sub>50%</sub> | M <sub>2.5%</sub> | M <sub>97.5%</sub> | M'            | M'            | %            |
|--------------------|-------------------|------------------|--------------|-------------|-------------|------------------|-------------------|--------------------|---------------|---------------|--------------|
| 61                 | Willisau          | 18,304           | 14           | 0.50        | 0.47        | 264              | 159               | 404                | 253           | 300           | 1.4%         |
| 62                 | Sursee            | 36,377           | 25           | 0.44        | 0.39        | 459              | 314               | 647                | 412           | 400           | 1.3%         |
| 63                 | Zug               | 57,527           | 61           | 0.64        | 0.66        | 1,066            | 825               | 1,343              | 1,104         | 1,100         | 1.9%         |
| 64                 | Schwyz            | 34,338           | 30           | 0.54        | 0.53        | 540              | 377               | 736                | 531           | 500           | 1.6%         |
| 65                 | Bellinzona        | 24,668           | 26           | 0.64        | 0.62        | 457              | 310               | 642                | 444           | 400           | 1.9%         |
| 66                 | Locarno           | 16,076           | 18           | 0.68        | 0.66        | 316              | 203               | 468                | 311           | 300           | 2.0%         |
| 67                 | Biasca            | 9,020            | 6            | 0.48        | 0.40        | 125              | 63                | 219                | 105           | 100           | 1.4%         |
| 68                 | Mendrisio         | 22,458           | 15           | 0.44        | 0.39        | 286              | 175               | 435                | 259           | 300           | 1.3%         |
| 69                 | <b>Lugano</b>     | <b>40,489</b>    | <b>78</b>    | <b>1.12</b> | <b>1.15</b> | <b>1,314</b>     | <b>1,047</b>      | <b>1,617</b>       | <b>1,364</b>  | <b>1,400</b>  | <b>3.2%</b>  |
| 70                 | Chur              | 21,048           | 33           | 0.91        | 0.95        | 554              | 395               | 75                 | 585           | 600           | 2.6%         |
| 71                 | Ilanz             | 7,064            | 7            | 0.63        | 0.59        | 129              | 66                | 220                | 122           | 100           | 1.8%         |
| 72                 | Davos             | 13,941           | 9            | 0.45        | 0.40        | 182              | 100               | 301                | 164           | 200           | 1.3%         |
| 73                 | Bad Ragaz         | 9,118            | 8            | 0.57        | 0.59        | 152              | 82                | 254                | 157           | 200           | 1.7%         |
| 74                 | Thuisis           | 7,600            | 8            | 0.65        | 0.66        | 143              | 77                | 241                | 147           | 100           | 1.9%         |
| 75                 | St.Moritz         | 9,588            | 9            | 0.59        | 0.53        | 165              | 90                | 275                | 148           | 100           | 1.7%         |
| 76                 | Bregaglia         | 403              | 0            | 0.62        | 0.59        | 7                | 2                 | 17                 | (7)           | 10            | 1.8%         |
| 77                 | Poschiavo         | 1,541            | 4            | 0.96        | 1.51        | 43               | 20                | 82                 | 68            | 70            | 2.8%         |
| 80                 | <b>Zürich</b>     | <b>137,673</b>   | <b>903</b>   | <b>3.85</b> | <b>3.87</b> | <b>15,389</b>    | <b>14,312</b>     | <b>16,496</b>      | <b>15,596</b> | <b>16,000</b> | <b>11.2%</b> |
| 81                 | Bülach            | 78,667           | 117          | 0.88        | 0.92        | 2,013            | 1,672             | 2,399              | 2,107         | 2,100         | 2.6%         |
| 82                 | Schaffhausen      | 43,022           | 48           | 0.67        | 0.70        | 837              | 629               | 1,090              | 880           | 900           | 1.9%         |
| 83                 | Kloten            | 54,466           | 79           | 0.86        | 0.92        | 1,358            | 1,085             | 1,671              | 1,464         | 1,500         | 2.5%         |
| 84                 | <b>Winterthur</b> | <b>65,874</b>    | <b>76</b>    | <b>0.69</b> | <b>0.70</b> | <b>1,322</b>     | <b>1,052</b>      | <b>1,639</b>       | <b>1,343</b>  | <b>1,300</b>  | <b>2.0%</b>  |
| 85                 | Frauenfeld        | 46,250           | 53           | 0.69        | 0.71        | 920              | 705               | 1,183              | 959           | 1,000         | 2.0%         |
| 86                 | Uster             | 68,489           | 81           | 0.71        | 0.68        | 1,409            | 1,128             | 1,739              | 1,362         | 1,400         | 2.1%         |
| 87                 | Küsnacht (ZH)     | 45,541           | 59           | 0.77        | 0.80        | 1,017            | 786               | 1,295              | 1,072         | 1,100         | 2.2%         |
| 88                 | Horgen            | 70,814           | 90           | 0.76        | 0.78        | 1,556            | 1,263             | 1,897              | 1,620         | 1,600         | 2.2%         |
| 89                 | Dietikon          | 53,519           | 65           | 0.73        | 0.75        | 1,126            | 878               | 1,421              | 1,175         | 1,200         | 2.1%         |
| 90                 | <b>St.Gallen</b>  | <b>41,489</b>    | <b>73</b>    | <b>1.03</b> | <b>1.06</b> | <b>1,236</b>     | <b>979</b>        | <b>1,539</b>       | <b>1,291</b>  | <b>1,300</b>  | <b>3.0%</b>  |
| 91                 | Herisau           | 10,894           | 11           | 0.62        | 0.68        | 197              | 113               | 316                | 218           | 200           | 1.8%         |
| 92                 | Gossau (SG)       | 24,381           | 23           | 0.58        | 0.56        | 412              | 274               | 589                | 398           | 400           | 1.7%         |
| 93                 | Arbon             | 14,071           | 4            | 0.27        | 0.17        | 112              | 50                | 210                | 70            | 100           | 0.8%         |
| 94                 | Altstätten        | 53,310           | 43           | 0.50        | 0.47        | 768              | 573               | 1,010              | 739           | 700           | 1.4%         |
| 95                 | Wil (SG)          | 22,522           | 18           | 0.51        | 0.54        | 332              | 211               | 491                | 358           | 400           | 1.5%         |
| 96                 | Wattwil           | 12,223           | 13           | 0.65        | 0.65        | 230              | 136               | 360                | 234           | 200           | 1.9%         |
| <i>Switzerland</i> |                   | <i>2,718,741</i> | <i>4,534</i> | <i>1.00</i> | <i>1.00</i> | <i>78,468</i>    | <i>63,800</i>     | <i>96,228</i>      | <i>79,510</i> | <i>80,000</i> | <i>2.9%</i>  |

Legend: PCA, postal code area for Switzerland; p, male permanent population aged 15–64; s, number of EMIS-2010 survey participants living in Switzerland; k, local MSM concentration factor; k', local MSM concentration factor (age-stratified approach); M, number of MSM aged 15–64 (M<sub>50%</sub>, M<sub>2.5%</sub>, M<sub>97.5%</sub>, Bayesian approach with 95% credible intervals; M', age-stratified approach; M', rounded); %, proportion of MSM among men (based on M<sub>50%</sub>). The nine largest Swiss cities are bolded.

Note: All regional distribution data reported here are based on postal code areas, not municipalities, which affects the reported concentration factors K<sub>i</sub>, e.g. for PCA 12 (Geneva). To consider the specific geographical position of Geneva, which is nearly completely surrounded by France, we used EMIS-2010 data of MSM living in France and we temporarily added men who were born in Switzerland but living in the surrounding French Departments *Ain* or *Haute-Savoie* to Geneva's PCA. However, this affected Geneva's concentration factor only marginally. The main reason for Geneva's rather low concentration factors seems to be the wide geographical scope of PCA 12.
